# Supplementary material
Source: PubMed Central journal article supplement (PMC1482549)
Supplement: pnas_0603327103_5.pdf [file pnas_0603327103_5.pdf]

**Table 3. X-ray diffraction data collection  
parameters and statistics**

|                                                                                                                                                        |                                                                              |
|--------------------------------------------------------------------------------------------------------------------------------------------------------|------------------------------------------------------------------------------|
| Space group                                                                                                                                            | I4 <sub>1</sub>                                                              |
| Cell parameters                                                                                                                                        | $a = 73.98 \text{ \AA}$ , $b = 73.98 \text{ \AA}$ , $c = 33.247 \text{ \AA}$ |
|                                                                                                                                                        | $\alpha = 90^\circ$ , $\beta = 90^\circ$ , $\gamma = 90^\circ$               |
| Resolution, $\text{\AA}$                                                                                                                               | 50.0 ~ 1.60 (1.63 ~ 1.60)*                                                   |
| $R_{\text{sym}}$ , %                                                                                                                                   | 4.6 (12.2) *                                                                 |
| Completeness, %                                                                                                                                        | 99.3 (96.8) *                                                                |
| Redundancy                                                                                                                                             | 8.0 (4.9) *                                                                  |
| Mean $I/\sigma$                                                                                                                                        | 43.91 (9.88) *                                                               |
| Average $B$ factors, $\text{\AA}^2$ †                                                                                                                  | 14.865                                                                       |
| Reflections                                                                                                                                            | Total: 96,185    Observed ( $I > 1$ ): 96,180                                |
| Unique                                                                                                                                                 | 12001 (574) *                                                                |
| Bond lengths, $\text{\AA}$                                                                                                                             | 0.012 ‡                                                                      |
| Bond angles, $^\circ$                                                                                                                                  | 1.97 ‡                                                                       |
| <p>* The values in parenthesis refer to the last resolution shell.</p> <p>† Calculated from Wilson Plot.</p> <p>‡ rms deviation from ideal values.</p> |                                                                              |
