# Supplementary material
Source: PubMed Central journal article supplement (PMC1482549)

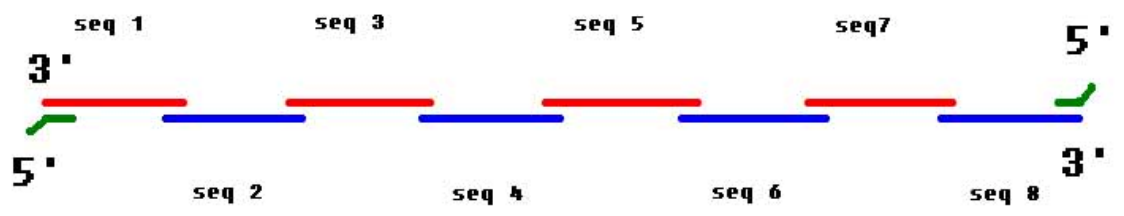

Supplement: pnas_0603327103_1.pdf [file pnas_0603327103_1.pdf]

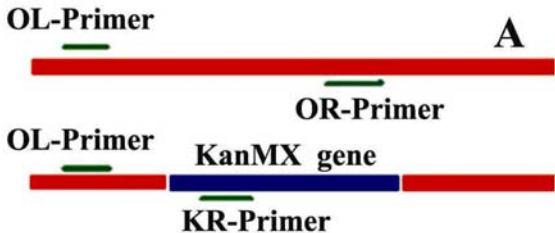

**B**

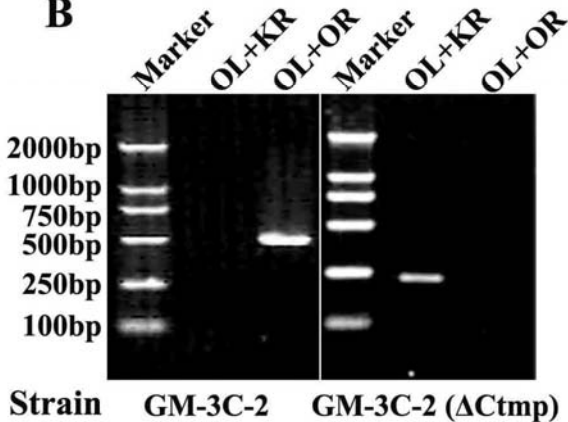

Supplement: pnas_0603327103_2.pdf [file pnas_0603327103_2.pdf]

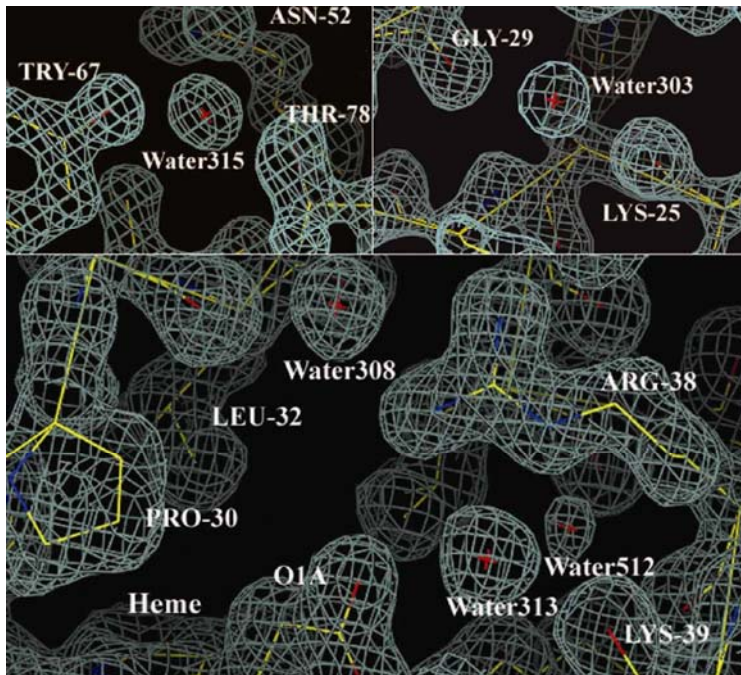

Supplement: pnas_0603327103_3.pdf [file pnas_0603327103_3.pdf]

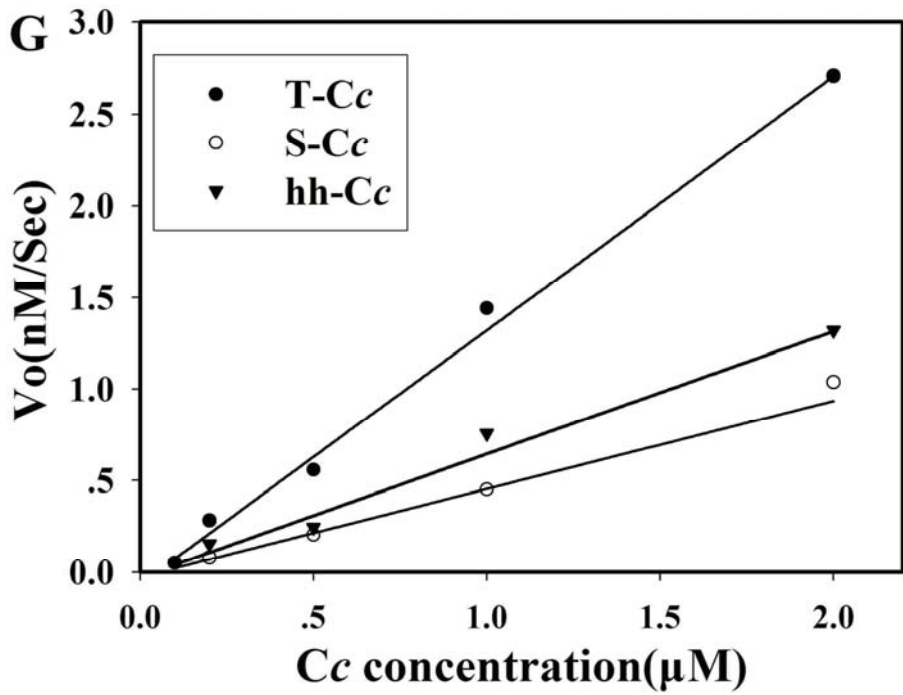

Supplement: pnas_0603327103_4.pdf [file pnas_0603327103_4.pdf]
